# Supplementary material for: Internalized FGF-2-Loaded Nanoparticles Increase Nuclear ERK1/2 Content and Result in Lung Cancer Cell Death
Source: PubMed Central journal article supplement (PMC7221911; doi:10.3390/nano10040612), 2020-03-27
Supplement: nanomaterials-10-00612-s001.pdf [file nanomaterials-10-00612-s001.pdf]

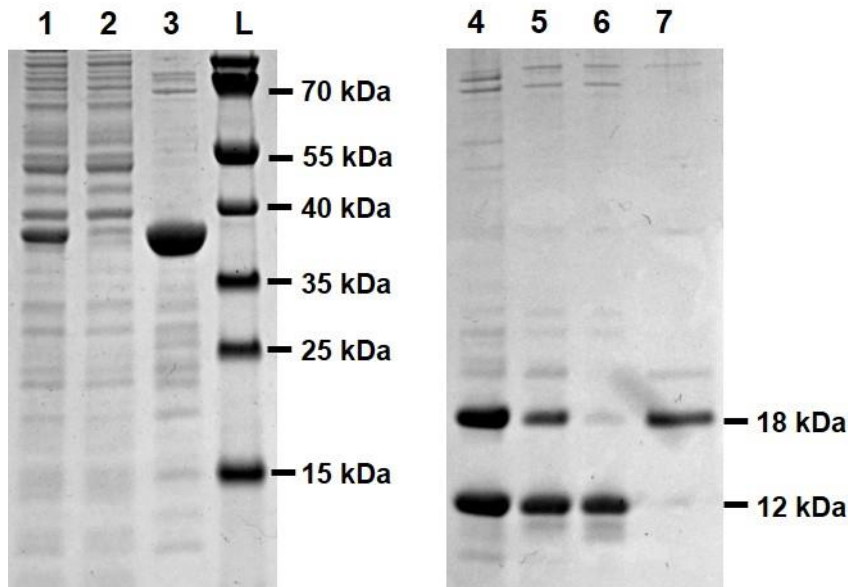

**Figure S1.** Expression and purification of recombinant human FGF-2 (18 kDa isoform) from *E. coli*. Lane 1: Supernatant of *E. coli* crude extract applied onto Ni-NTA column. Lane 2: Flow-through fraction from Ni-NTA column. Lane 3: Eluate from Ni-NTA column. Lane 4: Thrombin cleavage of the thioredoxin-FGF-2 fusion protein eluted from Ni-NTA column (FGF-2, 18 kDa; thioredoxin, 12 kDa). Lane 5: Loading onto heparin-sepharose column. Lane 6: Flow-through fraction from heparin-sepharose (thioredoxin). Lane 7: Eluate from heparin-sepharose (FGF-2).

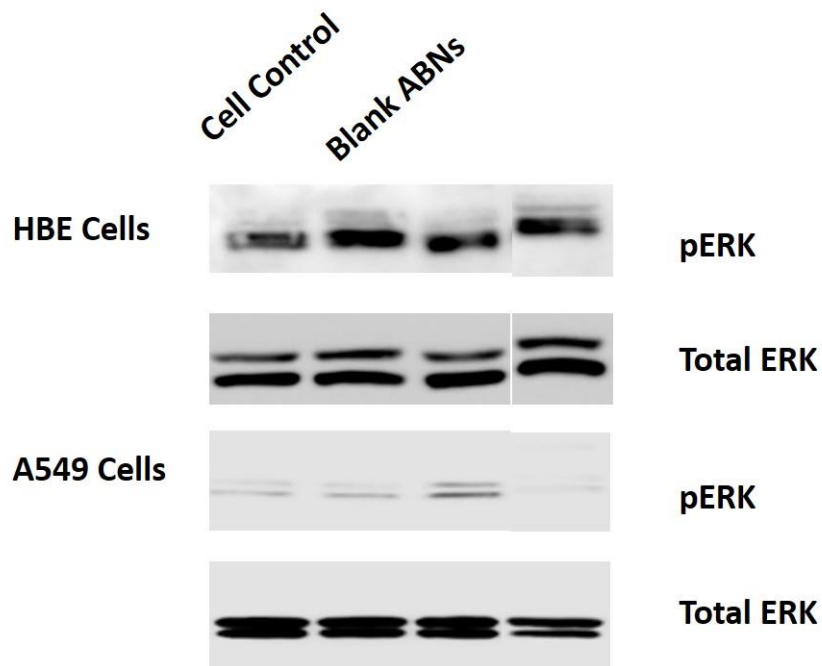

**Figure S2.** Western blot gel images of whole cell lysate from HBE1s and A549s with and without FGF-2-loaded ABN treatment.

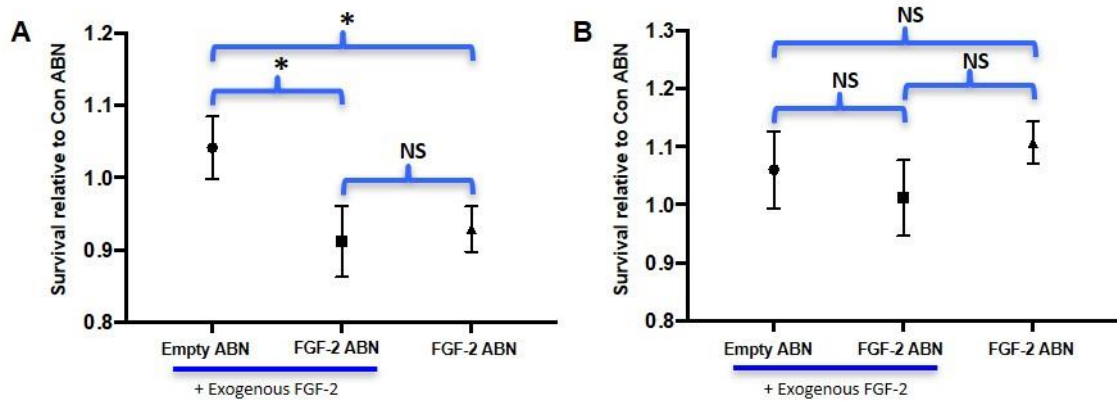

**Figure S3.** Treatment with FGF-2-loaded ABNs reduces the number of (A) A549s, but not (B) HBE1 cells, even in the presence of free FGF-2. Each cell type was grown in their respective mediums and then transferred to a mixed A549/HBE1 medium (1:1) for 48 h. Control ABNs (empty) or FGF-2-loaded ABNs were suspended in mixed medium with exogenous FGF-2, and added at 100  $\mu\text{g}/\text{mL}$  to different wells. FGF-2-loaded ABNs were also examined with no additional FGF-2 added to the medium. After 24 h, cell number was determined using CyQuant Direct Cell Proliferation Assay ( $n = 3-4$ ). \*  $P < 0.05$ ; NS = Not Significant. A.U. = Arbitrary Units.
